# Supplementary material for: Two RNase H2 Mutants with Differential rNMP Processing Activity Reveal a Threshold of Ribonucleotide Tolerance for Embryonic Development
Source: PubMed Central journal article supplement (PMC6309994; doi:10.1016/j.celrep.2018.10.019), 2018-10-30
Supplement: NIHMS1512005-supplement-1.pdf [file NIHMS1512005-supplement-1.pdf]

**Cell Reports, Volume 25**

**Supplemental Information**

**Two RNase H2 Mutants with Differential rNMP  
Processing Activity Reveal a Threshold of  
Ribonucleotide Tolerance for Embryonic Development**

**Ryo Uehara, Susana M. Cerritelli, Naushaba Hasin, Kiran Sakhuja, Mariya London, Jaime Iranzo, Hyongi Chon, Alexander Grinberg, and Robert J. Crouch**

A

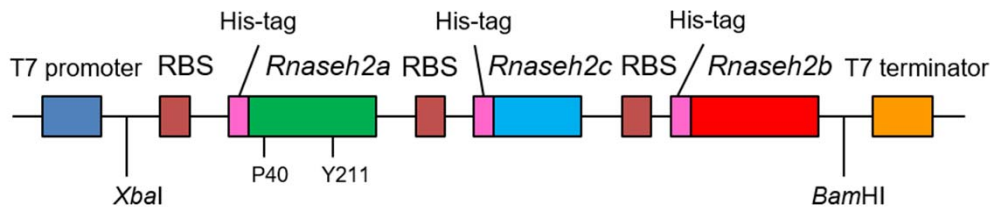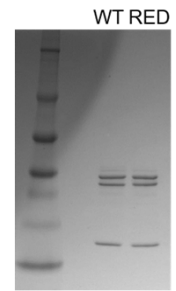

B

### Comparison of 18mer RNA/DNA <sup>32</sup>P and FAM gel assay

RNase H<sup>RED</sup> cleaves at multiple sites in "18 mer" RNA substrate

But exhibits different sequence preference near 3'-end of RNA

\* Marks where products of RNase H<sup>RED</sup> differ from RNase H<sup>WT</sup>

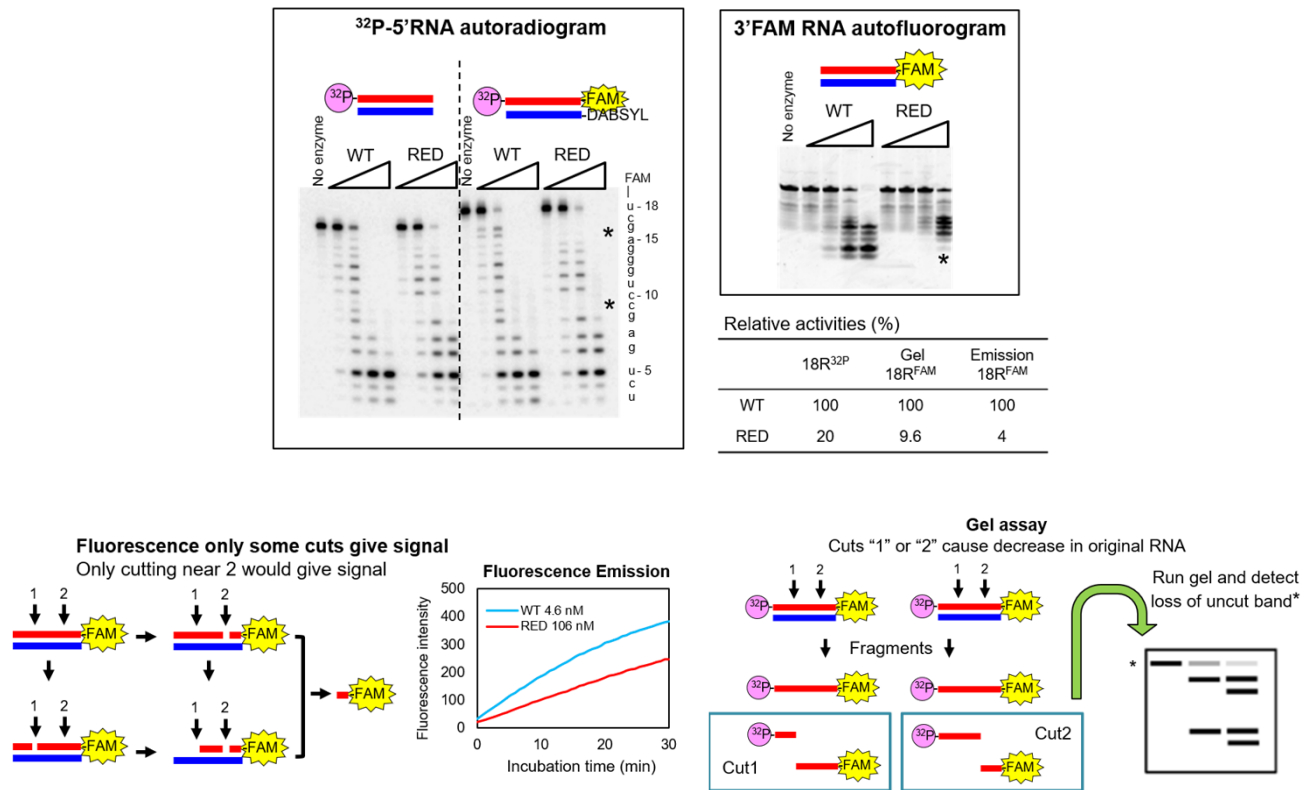

**Figure S1. In vitro characterization of RNase H2<sup>RED</sup>.** Related to Figure 1 and STAR Methods. (A) Expression vector and purified protein. *Rnaseh2a*, *Rnaseh2c* and *Rnaseh2b* cDNAs were cloned and fused with N-terminal His-tag on pET15b vector as shown above. RED mutation (P40D and Y211A) was introduced by Quikchange. Three subunits of mouse RNase H2<sup>WT</sup> and RNase H2<sup>RED</sup> were expressed in BL21(DE3) *E. coli* strain, purified as described in STAR Methods, and analyzed by 10-20% SDS-PAGE as shown below. (B) Comparison of <sup>32</sup>P-labeled and fluorescent substrate assays. Top; RNase H2<sup>RED</sup> fails to cleave several sites of 18bp RNA/DNA hybrids. Autoradiogram of <sup>32</sup>P-labeled substrates (left) in sequencing acrylamide gel and autofluorogram (right) of the same substrate upon enzyme cleavages. Relative activities are shown in table when measured by loss of starting substrate. An activity toward 18R-FAM was determined by both gel assay and emission measurement. Enzymes are RNase H<sup>WT</sup> (WT) and RNase H2<sup>RED</sup> (RED). Bottom; Cleavages by RNase H2<sup>RED</sup> may not be efficient to release FAM modified RNA from DNA (left). Cartoon of assays to detect fluorescence emission from FAM modified substrate upon cleavage by RNase H2. RNase H2<sup>RED</sup> activity was determined to be about 4% of wild type from fluorescence emission curves. Cartoon of each assay and that <sup>32</sup>P assay detects all multiple cleavages (right).

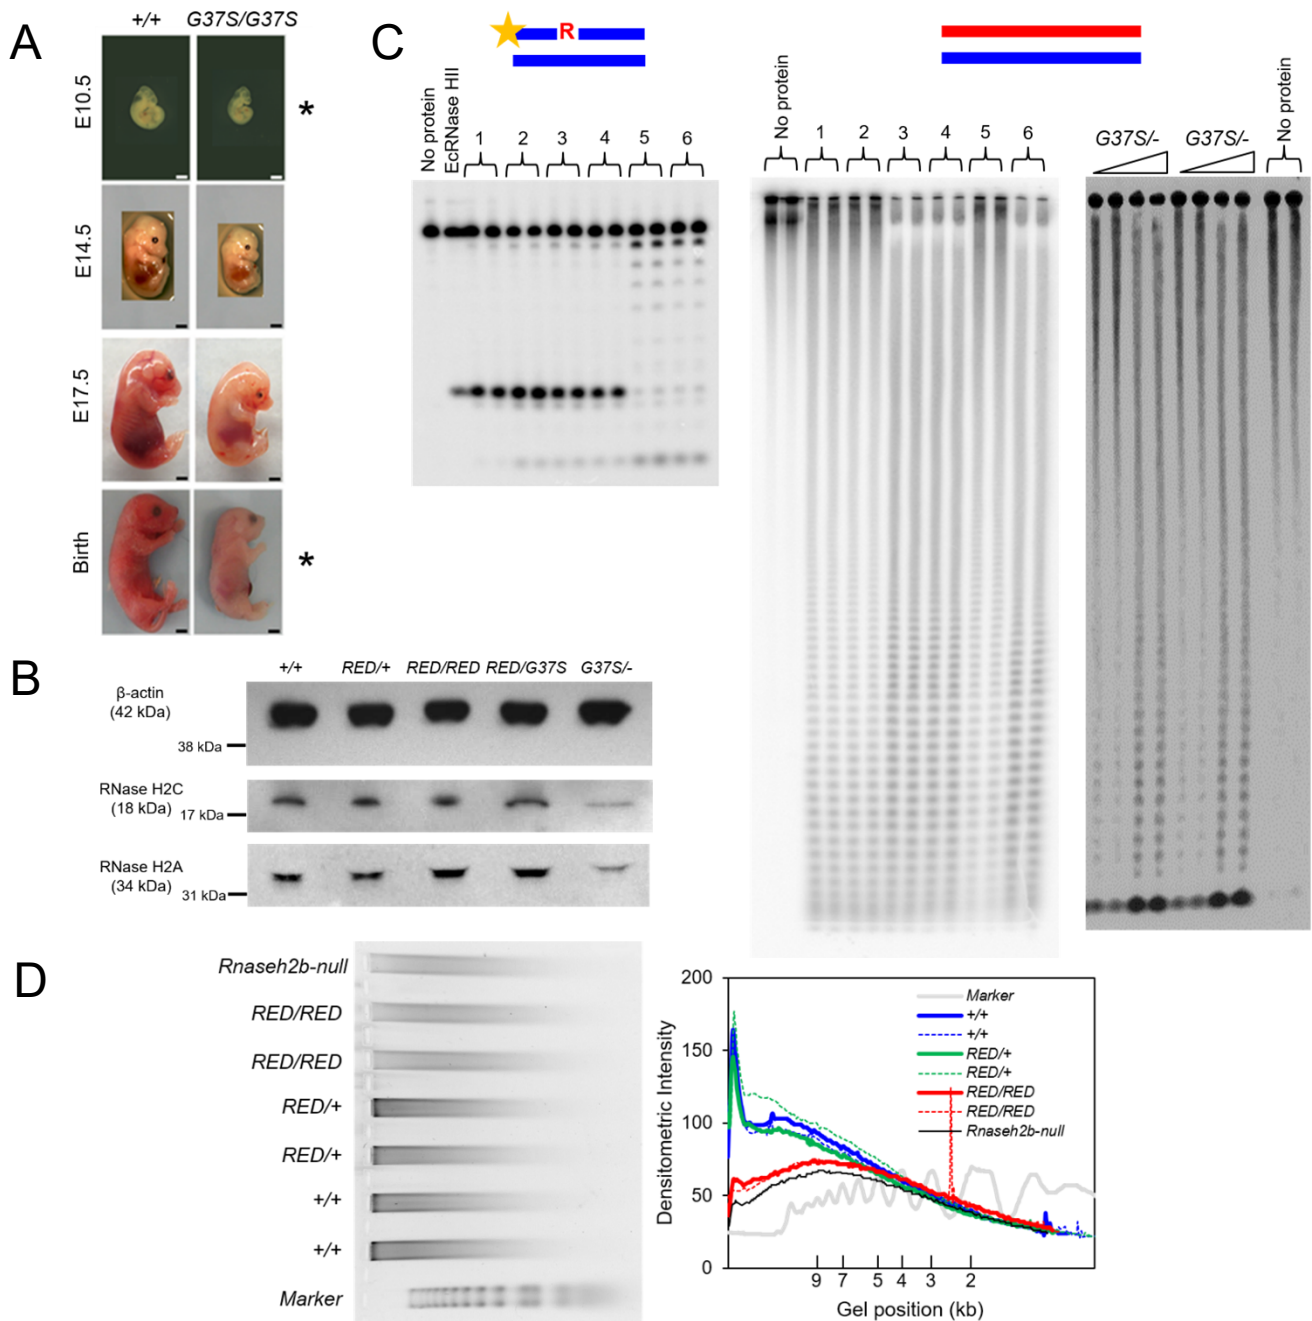

**Figure S2. Loss of RER activity leads to embryonic lethality in mouse. Related to Figure 2 and 4.** A) Perinatal lethality of AGS-hypomorphic mutant mice. *Rnaseh2a*<sup>+/+</sup> (+/+) and *Rnaseh2a*<sup>G37S/G37S</sup> (G37S/G37S) embryos and neonates. Scale bar, 1 mm. Mice pictures at E10.5 and at birth (marked with \*) are same as paper previously published (Pokatayev, J. Exp. Med. 2016). B) Western blot using MEF homogenates. Protein lysates from primary MEFs *Rnaseh2a*<sup>+/+</sup> *p53*<sup>-/-</sup> (+/+), *Rnaseh2a*<sup>RED/+</sup> *p53*<sup>-/-</sup> (RED/+), *Rnaseh2a*<sup>RED/RED</sup> *p53*<sup>-/-</sup> (RED/RED), *Rnaseh2a*<sup>RED/G37S</sup> *p53*<sup>-/-</sup> (RED/G37S), *Rnaseh2a*<sup>G37S/-</sup> *p53*<sup>+/+</sup> (G37S/-) were separated by 10-20% SDS-PAGE, transferred to PVDF membrane and probed with anti-β-actin antibodies (Abcam), anti-RNase H2C (Abcam) and anti-RNase H2A (Proteintech). C) Cleavage of 1R and poly-rA/poly-dT substrates with embryo lysates. Embryo lysates were prepared as described in Experimental Procedures and used for assays. Enzyme reaction was performed at 37°C for 30 min in duplicate. Reaction products were analyzed by (left) 20 and (middle, right) 12% TBE-Urea PAGE. (Left and middle) Lane 1 and 2, two *Rnaseh2a*<sup>+/+</sup> embryos, lane 3 and 4, *Rnaseh2a*<sup>RED/+</sup> embryos, lane 5 and 6, *Rnaseh2a*<sup>RED/RED</sup> embryos. (Right) Two *Rnaseh2a*<sup>G37S/-</sup> (G/-) embryos. No protein lane contained homogenization buffer and EcRNase HII lane contained 10 U of *E. coli* RNase HII instead of embryo lysates. The two gel pictures on the right were separately uniformly modified in pptX file using Format “artist”. D) No significant rNMPs accumulation in *Rnaseh2a*<sup>RED/+</sup> DNA. Genomic DNA was isolated from cell lines established from two independent *Rnaseh2a*<sup>+/+</sup> *p53*<sup>-/-</sup>, *Rnaseh2a*<sup>RED/+</sup> *p53*<sup>-/-</sup>, *Rnaseh2a*<sup>RED/RED</sup> *p53*<sup>-/-</sup> embryos and analyzed by alkaline agarose gel electrophoresis with molecular marker and control (*Rnaseh2b*-null). The genotype of each cell line is shown in the inset of the figure.



**Table S1. Oligo sequences used in this study. Related to STAR Methods.**

| Name                                     | Sequence (5' to 3')                 | Purpose          | Source         |
|------------------------------------------|-------------------------------------|------------------|----------------|
| Rnaseh2a-P40D fwd                        | GGTCAGCATCAAGAGCCACTGCAG            | Genotyping       | Lofstrand Labs |
| Rnaseh2a-P40D rev                        | CCCGCTCGTTCTCTGTCAAGG               | Genotyping       | Lofstrand Labs |
| Rnaseh2a-Y211A fwd                       | TCCCGGGATAGAGGTGACAG                | Genotyping       | Lofstrand Labs |
| Rnaseh2a-Y211A rev                       | AAGCTGGAGACCAGCCTGGG                | Genotyping       | Lofstrand Labs |
| Rnaseh2a-del fwd                         | GAGACCAGTGTTCGCGCTGTGC              | Genotyping       | Lofstrand Labs |
| Rnaseh2a-del rev                         | CAGGCTTCACTGAGTCTCTGGC              | Genotyping       | Lofstrand Labs |
| p53-ko fwd                               | CAGCCTCTGTTCCACATACT                | Genotyping       | Lofstrand Labs |
| p53-ko rev                               | TGGATGGTGGTATACTCAGAGC              | Genotyping       | Lofstrand Labs |
| Sting-ko fwd                             | GGCGGTGATTTTGGCGATAC                | Genotyping       | Lofstrand Labs |
| Sting-ko rev                             | AATGCGGGTTCGCTTCACTTA               | Genotyping       | Lofstrand Labs |
| Actin fwd                                | CTAAGGCCAACCGTGA AAG                | Quantitative PCR | Lofstrand Labs |
| Actin rev                                | ACCAGAGGCATACAGGGACA                | Quantitative PCR | Lofstrand Labs |
| Rnaseh2a fwd                             | GGTCGTTGTCTGCTGAGTTC                | Quantitative PCR | Lofstrand Labs |
| Rnaseh2a rev                             | AGATCTGCCAAGCGAGACAG                | Quantitative PCR | Lofstrand Labs |
| Cdkn1a fwd                               | TCCACAGCGATATCCAGACA                | Quantitative PCR | Lofstrand Labs |
| Cdkn1a rev                               | GGACATCACCAGATTGGAC                 | Quantitative PCR | Lofstrand Labs |
| Ccng1 fwd                                | TTAGTAGGCCTGTCGGATCG                | Quantitative PCR | Lofstrand Labs |
| Ccng1 rev                                | AGCAGTTTCTGAGAGTCAGTTGTC            | Quantitative PCR | Lofstrand Labs |
| Ifit1 fwd                                | TCTAAACAGGGCCTTG CAG                | Quantitative PCR | Lofstrand Labs |
| Ifit1 rev                                | GCAGAGCCCTTTTTGATAATGT              | Quantitative PCR | Lofstrand Labs |
| Ifit3 fwd                                | TGAACTGCTCAGCCCACA                  | Quantitative PCR | Lofstrand Labs |
| Ifit3 rev                                | TCCCGGTTGACCTCACTC                  | Quantitative PCR | Lofstrand Labs |
| Cxcl10 fwd                               | ATGACGGGCCAGTGAGAATG                | Quantitative PCR | Lofstrand Labs |
| Cxcl10 rev                               | ATTCCGGATT CAGACATCTCT              | Quantitative PCR | Lofstrand Labs |
| 1R substrate                             | GACACcTGATTC                        | Enzyme activity  | IDT            |
| 12R substrate                            | gacaccugauuc                        | Enzyme activity  | IDT            |
| 12 mer reverse complement                | GAATCAGGTGTC                        | Enzyme activity  | Lofstrand Labs |
| 1R substrate (fluorescence)              | GATCTGAGCCTGGGgGCT                  | Enzyme activity  | TriLink        |
| 18R substrate (fluorescence)             | gaucugagccugggagcu                  | Enzyme activity  | TriLink        |
| 18 mer reverse complement (fluorescence) | AGCTCCCAGGCTCAGATC                  | Enzyme activity  | Lofstrand Labs |
| 1R hairpin-DNA duplex                    | GACACcTGATTCGG/iBio-dT/AGAATCAGGTGT | SPR analysis     | IDT            |
